# Supplementary material
Source: PubMed Central journal article supplement (PMC3053184)
Supplement: supp_76.6.577_Fig_e-1.pdf [file supp_76.6.577_Fig_e-1.pdf]

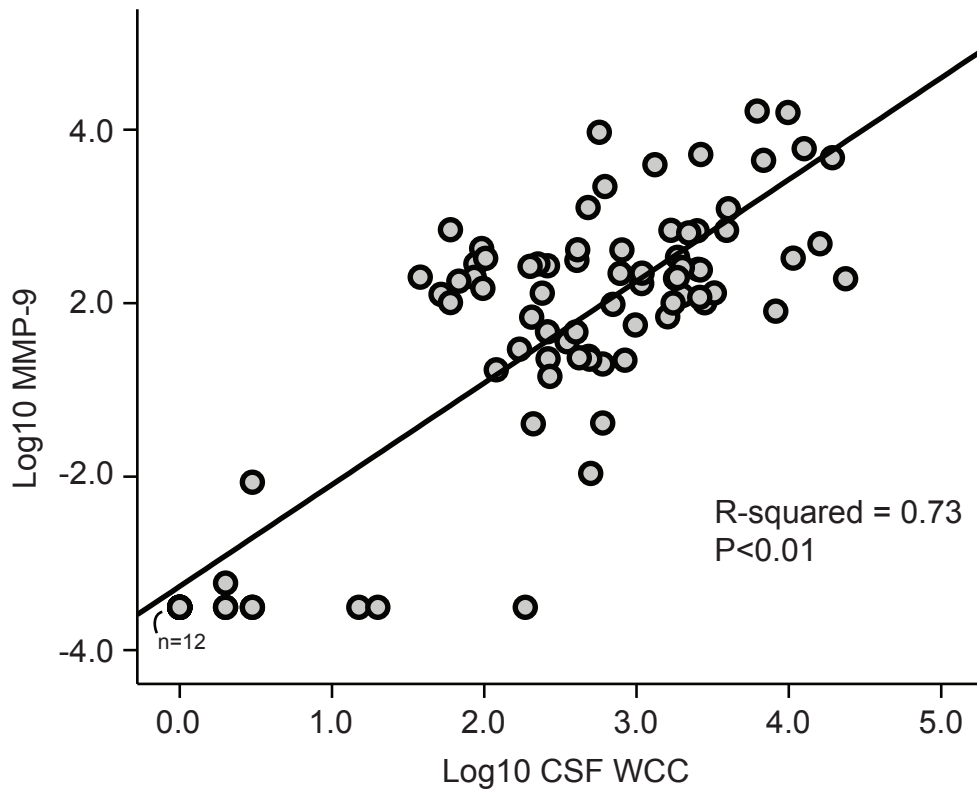

Figure e-1: Absolute CSF white cell count is significantly correlated with CSF MMP-9 concentration in patients with CNS infections. Baseline CSF total white cell counts in patients with CNS infections were correlated with MMP-9 concentration (measured by ELISA) using Log10 transformed data. The R2 value for the correlation was 0.73 ( $p < 0.01$ ).
